# Supplementary material
Source: PubMed Central journal article supplement (PMC2966115)
Supplement: supp_M110.170415_Frillingos-2010b_TableS1.pdf [file supp_M110.170415_Frillingos-2010b_TableS1.pdf]

## Supplemental Data

**Table S1.** Sequence analysis of the engineered YgfO mutants

| Mutant                                      | codon sequence                          |
|---------------------------------------------|-----------------------------------------|
| <i>Replacements at TM8</i>                  |                                         |
| F259C                                       | C/TTT/CAT/CAG/TGC/CTG/GTG/GTT/G         |
| L260C                                       | CAT/CAG/TTC/TGT/GTG/GTT/GGC/ACG         |
| V261C                                       | CAT/CAG/TTC/CTG/TGT/GTT/GGC/ACG         |
| V262C                                       | CAT/CAG/TTT/CTG/GTG/TGT/GGC/ACG         |
| G263C                                       | CTG/GTG/GTC/TGC/ACG/ATC/TAT/C           |
| T264C                                       | GTG/GTC/GGC/TGC/ATT/TAT/CTG/C           |
| I265C                                       | GTT/GGC/ACG/TGC/TAT/CTG/CTT/AGC         |
| Y266C                                       | GTT/GGC/ACG/ATT/TGT/CTG/CTT/AG          |
| L267C                                       | GGC/ACG/ATT/TAT/TGT/CTT/AGC/GTG/CTG     |
| L268C                                       | CG/ATT/TAT/CTG/TGC/AGC/GTG/CTG          |
| S269C                                       | CG/ATT/TAT/CTG/CTT/TGC/GTG/CTG/G        |
| V270C                                       | CTG/CTT/AGT/TGT/CTG/GAA/GCA/GTC         |
| L271C                                       | CTT/AGC/GTG/TGT/GAA/GCA/GTC             |
| E272C                                       | as in Karena & Frillingos, 2009         |
| A273C                                       | GTG/CTG/GAA/TGT/GTT/GGT/GAT/ATC/ACT/GCC |
| V274C                                       | CTG/GAA/GCA/TGT/GGT/GAT/ATC/ACT/GCC     |
| G275C                                       | GAA/GCA/GTT/TGT/GAT/ATC/ACT/GCC         |
| D276C                                       | GAA/GCA/GTC/GGT/TGT/ATC/ACC             |
| D276E(wt)                                   | GAA/GCA/GTT/GGC/GAA/ATC/ACC/GC          |
| D276N(wt)                                   | GAA/GCA/GTC/GGC/AAT/ATC/ACC/GC          |
| D276Q(wt)                                   | GAA/GCA/GTT/GGC/CAA/ATC/ACC/GC          |
| D276G(wt)                                   | GAA/GCA/GTT/GGC/GGT/ATC/ACC             |
| D276I(wt)                                   | GAA/GCA/GTC/GGC/ATT/ATC/ACC             |
| D276M(wt)                                   | GAA/GCA/GTT/GGC/ATG/ATC/ACC/GC          |
| D276H(wt)                                   | GAA/GCA/GTT/GGC/CAT/ATC/ACC/GC          |
| D276A(wt)                                   | GAA/GCA/GTT/GGC/GCA/ATC/ACT/GC          |
| D276T(wt)                                   | GAA/GCA/GTT/GGC/ACA/ATC/ACC/GC          |
| D276V(wt)                                   | GAA/GCA/GTT/GGC/GTT/ATC/ACT/GC          |
| <i>Replacements at the sequence 277-281</i> |                                         |
| I277C                                       | GAA/GCA/GTT/GGT/GAT/TGT/ACC/GCC/AC      |
| I277L(wt)                                   | GC/GAT/CTT/ACC/GCT/ACG/GCA/ATG          |
| T278C                                       | GTT/GGC/GAT/ATC/TGT/GCT/ACG/GCA/ATG     |
| T278N(wt)                                   | GAT/ATC/AAC/GCC/ACG/GCA/ATG/G           |
| T278S(wt)                                   | GAT/ATC/AGC/GCC/ACG/GCA/ATG/G           |
| T278G(wt)                                   | GAT/ATC/GGA/GCC/ACG/GCA/ATG/G           |
| T278A(wt)                                   | GAT/ATC/GCT/GCC/ACG/GCA/ATG/G           |
| T278Q(wt)                                   | GAT/ATC/CAG/GCC/ACG/GCA/ATG/G           |
| T278V(wt)                                   | GAT/ATC/GTC/GCC/ACG/GCA/ATG/G           |
| A279C                                       | GTC/GGC/GAT/ATC/ACT/TGT/ACG/GCA/ATG     |
| A279S(wt)                                   | GAT/ATC/ACC/TCC/ACG/GCA/ATG             |
| A279G(wt)                                   | GAT/ATC/ACC/GGA/ACG/GCA/ATG             |
| A279T(wt)                                   | GAT/ATC/ACC/ACC/ACG/GCA/ATG             |
| A279V(wt)                                   | GAT/ATC/ACC/GTC/ACG/GCA/ATG             |
| A279N(wt)                                   | GAT/ATC/ACC/GAC/ACG/GCA/ATG             |
| T280C                                       | GTT/GGC/GAT/ATC/ACT/GCT/TGT/GCA/ATG/G   |
| T280S(wt)                                   | GAT/ATC/ACT/GCC/TCG/GCA/ATG/GTT/TC      |
| T280N(wt)                                   | GAT/ATC/ACC/GCC/AAC/GCA/ATG/GTT/TC      |

T280G(wt) GAT/ATC/ACT/GCC/GGA/GCA/ATG/GTT/TC  
 T280A(wt) GAT/ATC/ACT/GCC/GCA/GCA/ATG/GTT/TC  
 T280Q(wt) GAT/ATC/ACT/GCC/CAG/GCA/ATG/GTT/TC  
 T280V(wt) GAT/ATC/ACT/GCC/GTC/GCA/ATG/GTT/TC  
 A281C GTT/GGC/GAT/ATC/ACT/GCC/ACT/TGT/ATG/GTT/TC  
 A281S(wt) GAT/ATC/ACC/GCT/ACG/TCA/ATG/GTT/TC  
 A281G(wt) GAT/ATC/ACC/GCT/ACG/GGA/ATG/GTT/TC  
 A281T(wt) GAT/ATC/ACC/GCT/ACG/ACC/ATG/GTT/TC  
 A281V(wt) GAT/ATC/ACC/GCT/ACG/GTC/ATG/GTT/TC  
 A281N(wt) GAT/ATC/ACC/GCT/ACG/AAC/ATG/GTT/TC  
 Quadruple(wt) GAT/ATC/GCC/ACC/GCG/ACA/ATG/GTT/TC

*Replacements at the loop between TM8 and TM9a*

M282C C/GAT/ATC/ACT/GCA/ACT/GCA/TGT/GTT/TCC/C  
 V283C GCA/ATG/TGT/TCT/CGT/CGT/CCC/ATT/C  
 S284C GCA/ATG/GTT/TGT/CGT/CGT/CCC/ATT/C  
 R285C GCA/ATG/GTT/TCC/TGT/CGT/CCC/ATT/C  
 R286C CA/ATG/GTT/TCC/CGT/TGT/CCC/ATT/CAG  
 P287C G/GTT/TCC/CGT/CGT/TGT/ATT/CAG/G  
 I288C CA/ATG/GTT/TCT/CGT/CGT/CCT/TGT/CAA/GGG/GAA/G  
 Q289C CA/ATG/GTT/TCT/CGT/CGT/CCT/ATT/TGT/GGG/GAA/G  
 G290C CCC/ATT/CAG/TGT/GAA/GAG/TAT/CAG/TCC  
 E291C CC/ATT/CAG/GGT/TGT/GAG/TAT/CAG/TCC  
 E292C CC/ATT/CAG/GGT/GAA/TGT/TAT/CAG/TCC  
 Y293C G/GAA/GAG/TGT/CAG/TGT/CGT/CTG/AAA/G  
 Q294C G/GAA/GAG/TAT/TGC/TCC/CGT/CTG/AAAG  
 S295C GAA/GAG/TAT/CAG/TGC/CGG/CTG/AAA/G  
 R296C GAG/TAT/CAG/TCT/TGC/CTG/AAA/GGC  
 L297C G/TAT/CAG/TCT/CGT/TGT/AAA/GGT/GGT/GTG/CTG  
 K298C G/TAT/CAG/TCT/CGT/TTA/TGT/GGT/GGC/GTG  
 G299C CGG/CTG/AAA/TGT/GGT/GTG/CTG  
 G299C(wt) as in G299C

*Replacements at TM9a*

G300C CTG/AAA/GGC/TGT/GTT/CTG/GCA/G  
 V301C G/AAA/GGC/GGT/TGT/CTT/GCA/GAT/G  
 L302C C/GGC/GTT/TGT/GCA/GAT/GGT/CTG  
 A303C GGC/GTG/CTT/TGT/GAT/GGT/CTG  
 D304C as in Karena & Frillingos, 2009  
 G305C G/CTG/GCA/GAT/TGT/CTG/GTT/TCT/G  
 G305A(wt) CTG/GCA/GAT/GCT/CTG/GTT/TCT/G  
 G305P(wt) CTG/GCA/GAT/CCT/CTG/GTT/TCT/G  
 L306C CTG/GCA/GAT/GGG/TGT/GTT/TCT/G  
 V307C GAT/GGT/CTG/TGT/TCC/GTT/ATC/GC  
 S308C GGT/CTG/GTT/TGT/GTT/ATC/GCC/TC  
 V309C CTG/GTT/TCT/TGT/ATC/GCC/TCC/G  
 I310C GTT/TCT/GTT/TGT/GCC/TCC/GCT/G  
 A311C CT/GTT/ATC/TGT/TCC/GCT/GTC/GG  
 S312C GTT/ATC/GCT/TGT/GCT/GTC/GGT/TC  
 A313C GTT/ATC/GCC/TCT/TGT/GTC/GGT/TC  
 V314C GCC/TCC/GCT/TGT/GGT/TCA/TTA/C

*Replacements at TM9b*

T342C GT/TAT/GTC/GGT/CGA/TGT/ATC/GCG/GTA/ATG  
 I343C GGG/CGA/ACT/TGT/GCG/GTA/ATG

|           |                                                                   |
|-----------|-------------------------------------------------------------------|
| A344C     | GG/CGA/ACC/ATC/ <b>TGT</b> /GTA/ATG/CTG                           |
| V345C     | CGA/ACC/ATC/ <u>GCA</u> / <b>TGT</b> /ATG/CTG/GTT/ATC             |
| M346C     | CGA/ACC/ATC/ <u>GCT</u> / <b>TGT</b> /CTG/GTT/ATC                 |
| L347C     | GCG/GTA/ATG/ <b>TGT</b> /GTT/ATC/CTC/GG                           |
| V348C     | CG/GTA/ATG/CTG/ <b>TGT</b> /ATC/CTC/GGC                           |
| I349C     | G/CTG/GTT/ <b>TGT</b> / <u>CTT</u> /GGC/TTA/TTT/CCG               |
| L350C     | G/CTG/GTT/ATC/ <b>TGT</b> /GGC/TTA/TTT/CCG                        |
| L350I(wt) | G/CTG/GTT/ATC/ <b>ATC</b> /GGC/TTA/TTT/CCG                        |
| L350V(wt) | G/CTG/GTT/ATC/GTT/GGC/TTA/TTT/CCG                                 |
| G351C     | GTT/ATC/CTC/ <b>TGT</b> / <u>TTG</u> / <u>TTC</u> /CCG/ATG/ATT/GG |
| G351P(wt) | G/GTT/ATC/CTC/ <b>CCC</b> /TTA/TTT/CCG                            |
| G351A(wt) | G/GTT/ATC/CTC/ <b>GCG</b> / <u>TTA</u> /TTT/CCG                   |
| L352C     | GTT/ATC/CTC/GGC/ <b>TGT</b> /TTT/CCG/ATG                          |
| F353C     | CTC/GGC/TTA/ <b>TGT</b> / <u>CCT</u> /ATG/ATT/GGC                 |
| P354C     | CTC/GGC/TTA/ <u>TTG</u> / <b>TGC</b> /ATG/ATT/GGC                 |
| P354G(wt) | CTC/GGC/TTA/TTT/ <b>GGC</b> /ATG/ATT/GGC                          |

---

DNA sequences are presented in the 5'→3' order with the mutated codons in *boldface* and base changes introduced outside the mutated codon in *underlined boldface*; mutants made in the wild-type background are indicated by (wt); single-Cys mutants made in the C-less background are indicated by the lack of (wt). Mutants were constructed in the biotin-acceptor domain (BAD)-tagged background. For mutants A273C, V274C, G275C, T278C, A279C, T280C and A281C, we employed one-stage PCR mutagenesis using a native EcoRV restriction site of YgfO (indicated in *italics*), followed by transfer of the PCR product to vector plasmid by BamHI-EcoRV or EcoRV-ApaI restriction fragment replacement; for all other mutants, we used two-stage PCR mutagenesis and the second-stage PCR product was transferred to vector plasmid by BamHI-ApaI restriction fragment replacement. The entire coding sequence of all constructs was verified by dsDNA sequencing. Quadruple(wt) denotes mutant T278**A**/A279**T**/T280**A**/A281**T**(wt).

#### References used in Table S1

Karena, E., and Frillingos, S. (2009). *J. Biol. Chem.* **284**, 24257-24268.
